# Supplementary material
Source: PubMed Central journal article supplement (PMC3915902)
Supplement: cr20149x6.pdf [file cr20149x6.pdf]

**A**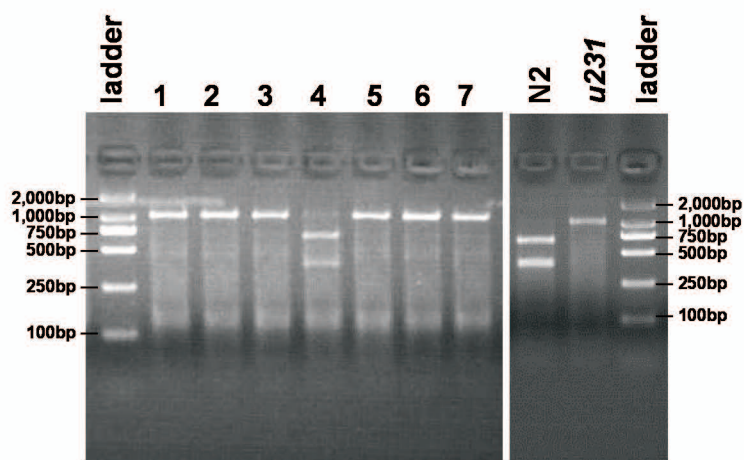**B**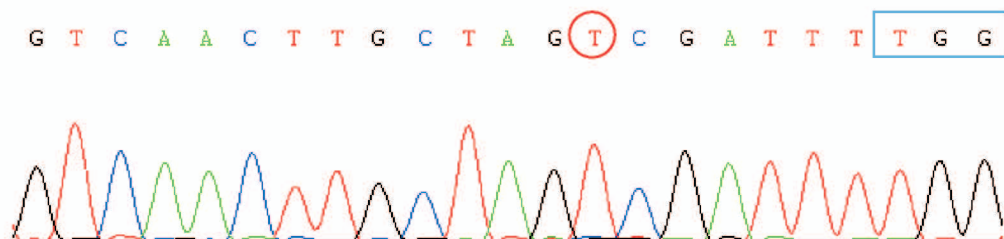**C**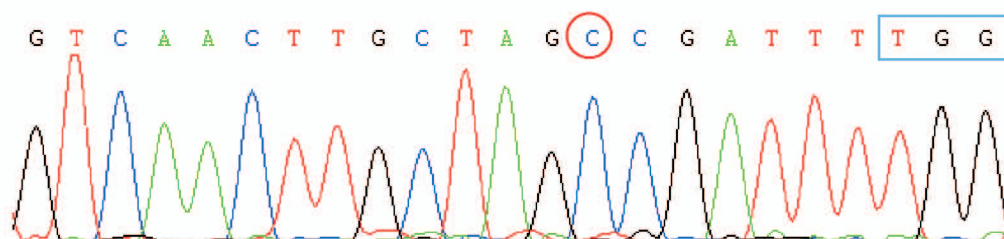**D**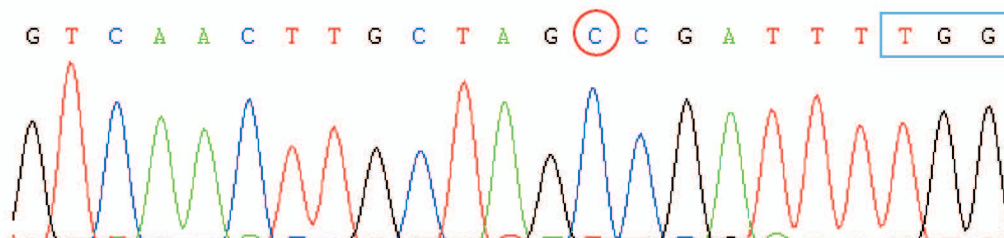

### Supplementary information, Figure S6 Gene editing at the *mec-4(u231)* locus

(A) A representative image of restriction fragment length polymorphism analysis of 7 Cas9 non-transgenic F1 animals derived from gene editing at the *mec-4(u231)* locus (lane 1-7). PCR products in lane 4 were partially digested by Nhe I. N2 and *mec-4(u231)* animals were used as a positive control and a negative control, respectively. (B-D) Sequencing tracks of *mec-4(u231)* animals (B), wild-type N2 animals (C), and the wild-type revertant derived from gene editing of *mec-4(u231)* animals (D) near the region targeted by sgRNA (GTCAACTTGCTAGTCGATTT) are shown. The nucleotide altered is marked with a red cycle. The blue boxes indicate the PAM sequences.
